# Supplementary material for: Ion transport induced room-temperature insulator–metal transition in single-crystalline Cu2Se
Source: Royal Society of Chemistry journal article supplement (doi:10.1039/d4nh00003j), 2024-01-01
Supplement: d4nh00003j1.pdf [file d4nh00003j1.pdf]

Supporting Information

## Ion transport induced room-temperature insulator-metal transition in single-crystalline $\text{Cu}_2\text{Se}$

Abdulsalam Aji Suleiman<sup>1#</sup>, Amir Parsi<sup>1#</sup>, Mohammadali Razeghi<sup>1</sup>, Uğur Başçı<sup>2</sup>, Saeyoung Oh<sup>3</sup>, Doruk Pehlivanoglu<sup>2</sup>, Hu Young Jeoung<sup>4</sup>, Kibum Kang<sup>3</sup>, T. Serkan Kasirga<sup>1,2\*</sup>

<sup>1</sup> Bilkent University UNAM – Institute of Materials Science and Nanotechnology, Ankara, 06800 Türkiye

<sup>2</sup> Department of Physics, Bilkent University, Ankara 06800 Türkiye

<sup>3</sup> Department of Materials Science and Engineering, Korea Advanced Institute of Science and Technology (KAIST), Daejeon 34141, Republic of Korea

<sup>4</sup> Graduate School of Semiconductor Materials and Devices Engineering, Ulsan National Institute of Science and Technology (UNIST), Ulsan 44919, Republic of Korea

\* corresponding author e-mail: [kasirga@unam.bilkent.edu.tr](mailto:kasirga@unam.bilkent.edu.tr)

# Equal contribution

### Crystal growth conditions

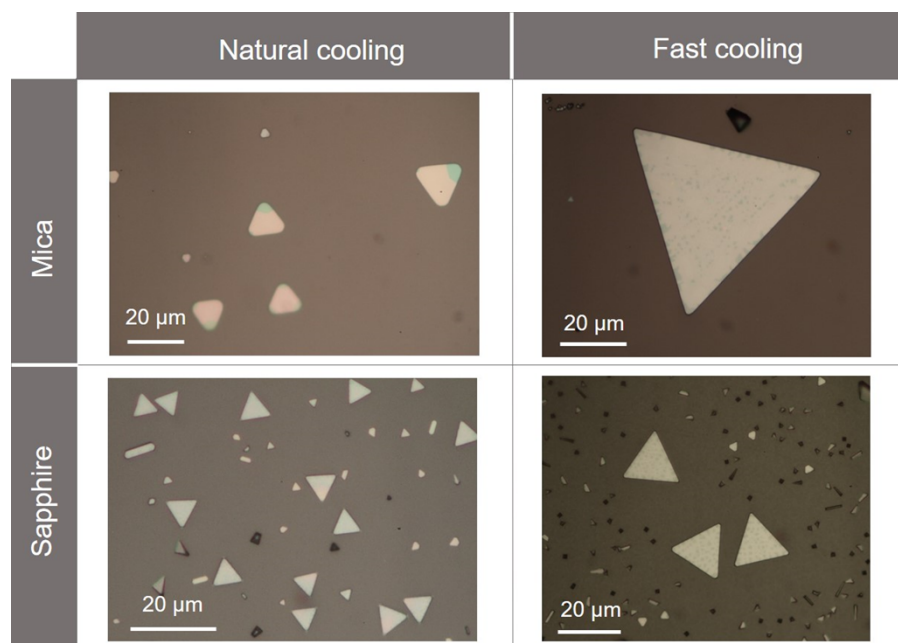

**Figure S1.** Optical micrographs of  $\text{Cu}_2\text{Se}$  crystals grown on mica and sapphire substrates under different cooling rates.

## SEM and AFM images

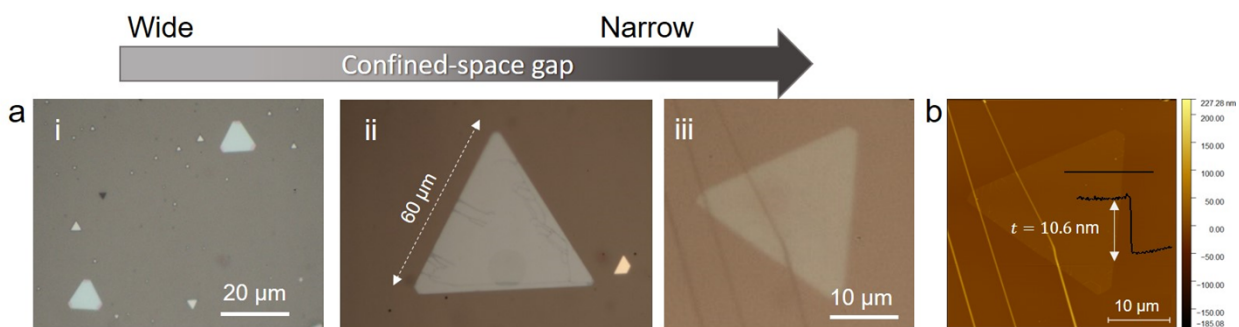

**Figure S2 a.** Optical micrographs of  $\text{Cu}_2\text{Se}$  crystals synthesized on mica substrate via a confined-space approach. **b.** AFM height trace map of an 11 nm thick  $\text{Cu}_2\text{Se}$  crystal.

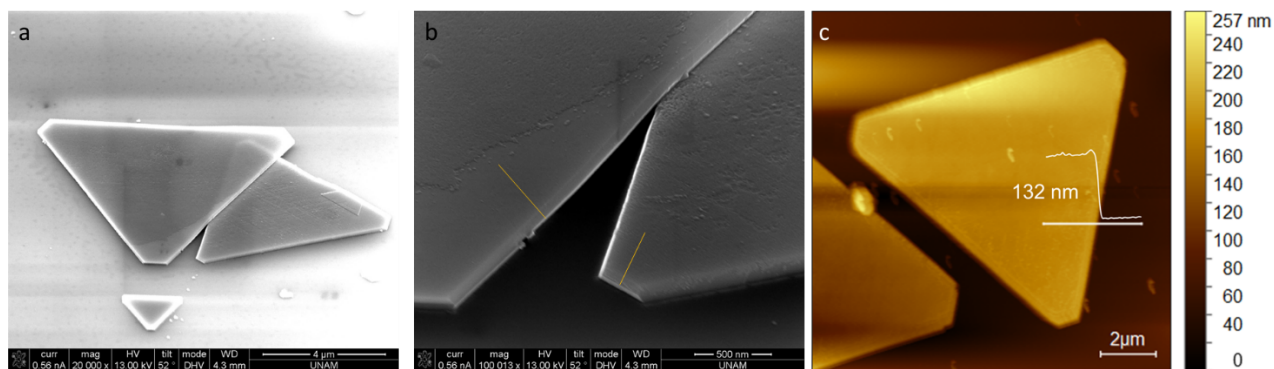

**Figure S3 a.** SEM micrograph of crystals transferred over  $\text{SiO}_2/\text{Si}$  substrate and **b.** close-up view of the crystal edges. Yellow dashed lines indicate the wedge-shaped edges of the crystal. **c.** AFM image of a  $\text{Cu}_2\text{Se}$  crystal with a thickness of 150 nm grown on a mica substrate. Crystal's wedge-shaped edges are visible in the AFM maps.

## Simulated SAED Pattern

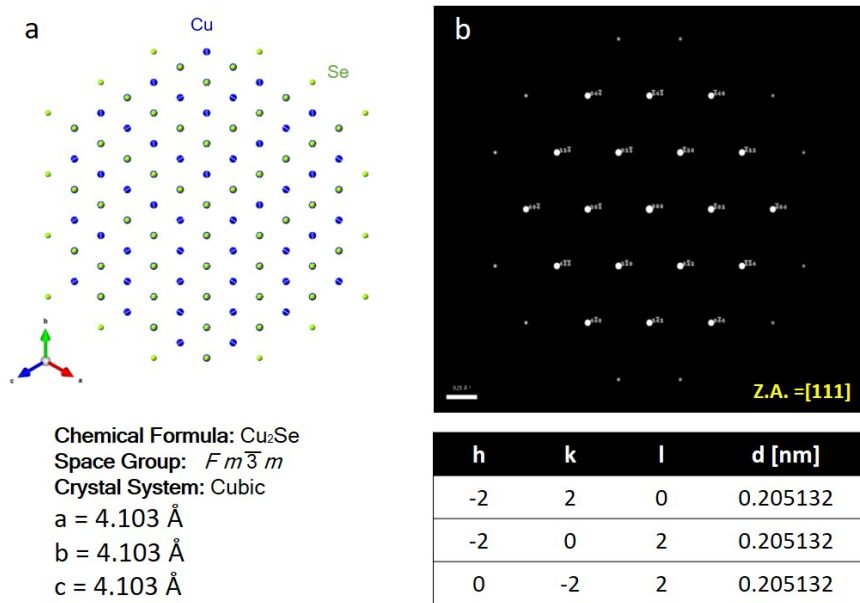

**Figure S4.** Atomic arrangement and simulated SAED pattern of cubic  $\text{Cu}_2\text{Se}$ .

## Temperature cycling of $\text{Cu}_2\text{Se}$ under vacuum

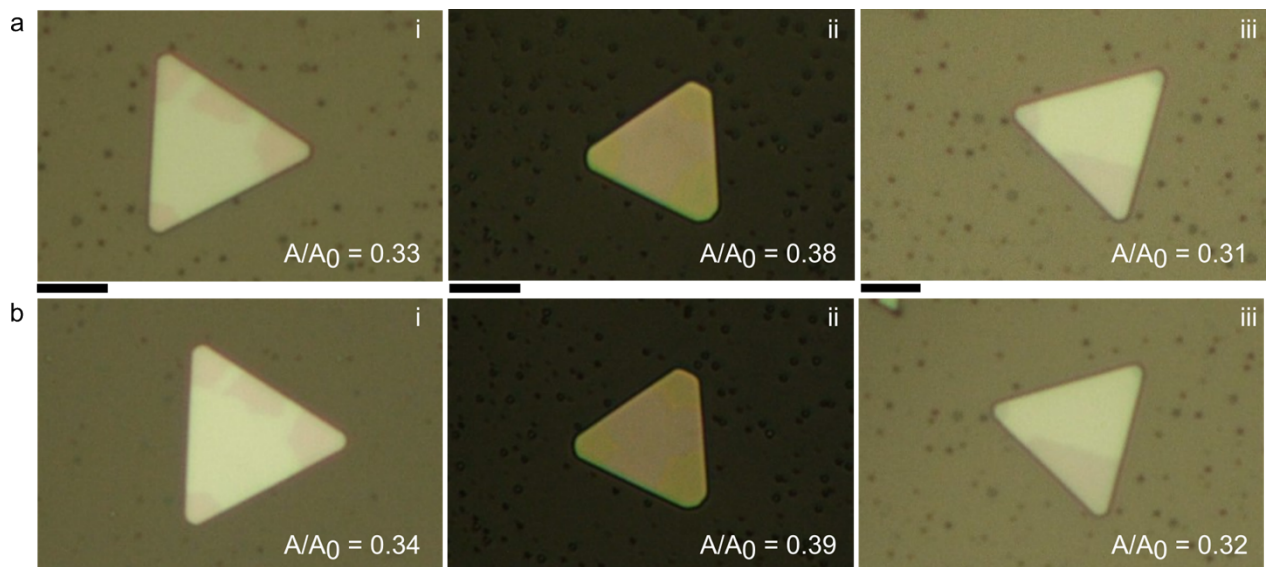

**Figure S5 a.** Optical micrographs of various  $\text{Cu}_2\text{Se}$  crystals taken before temperature cycling to 400 K are given. **b.** Optical micrographs of the same crystals at room temperature after heating to 400 K under  $10^{-2}$  mbar vacuum.  $A/A_0$  ratio is indicated in the figures. The scale bars for panels i and ii are  $10 \mu\text{m}$  and for iii  $5 \mu\text{m}$ .

### Temperature cycling under ambient and laser manipulation of the dark phase

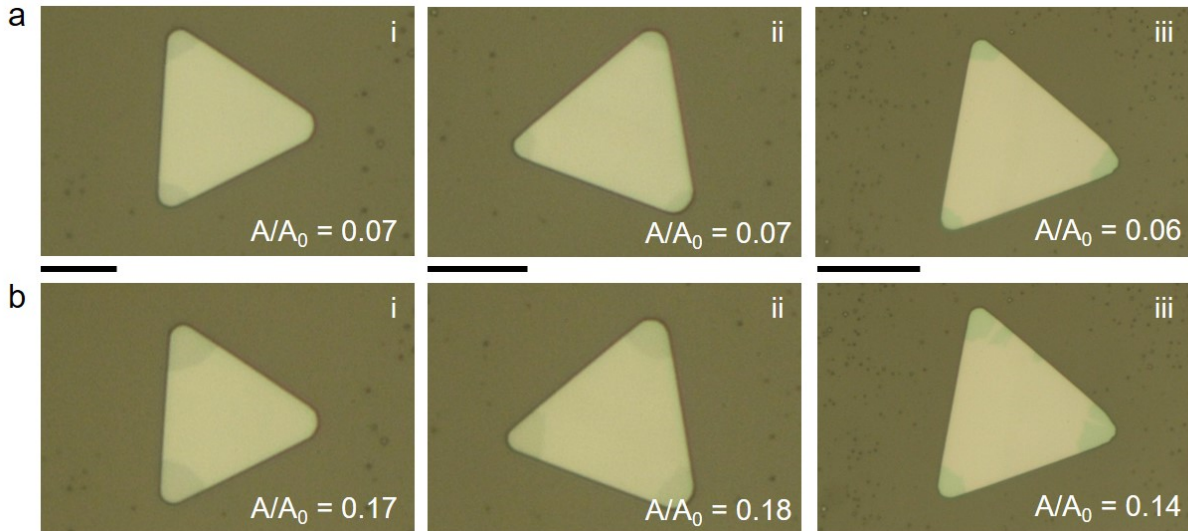

**Figure S6 a.** Optical micrographs of various  $\text{Cu}_2\text{Se}$  crystals taken before temperature cycling from room temperature to 400 K. **b.** Optical micrographs of the same crystals at room temperature, after heating to 400 K under ambient.  $A/A_0$  ratio is indicated in the figures. The scale bars for panels i and ii are 10  $\mu\text{m}$ , and for iii is 20  $\mu\text{m}$ .

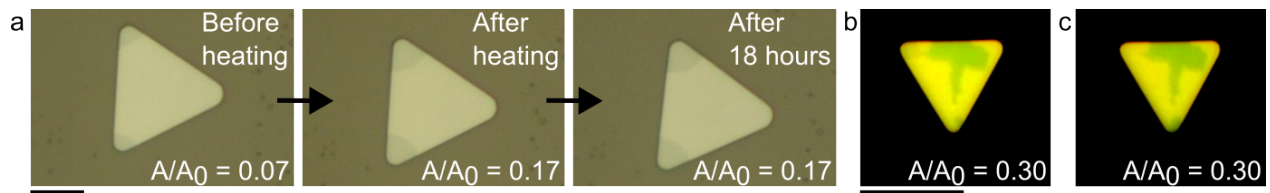

**Figure S7 a.** A series of optical micrographs of  $\text{Cu}_2\text{Se}$  crystal before heat cycling under ambient, after heat cycling above 400 K, and after keeping it at room temperature in ambient for 18 hours is shown. As discussed in the main text,  $A/A_0$  ratio increases after heat cycling and remains unchanged at room temperature. **b.** Optical microscope micrograph of a crystal at 348 K before laser manipulation and **c.** after laser manipulation.  $A/A_0$  ratio remains the same. The scale bars are 10  $\mu\text{m}$ .

### Laser illumination-induced phase transition

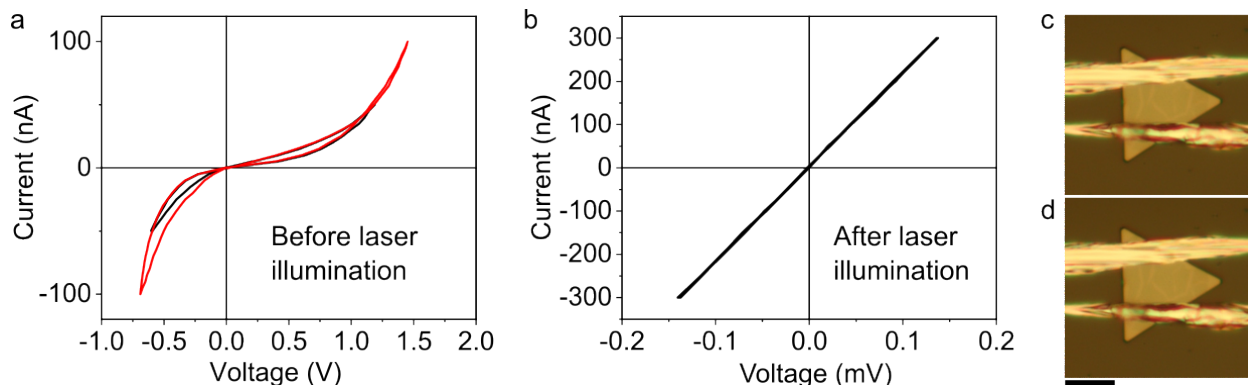

**Figure S8 a.** I-V curves of an indium-contacted  $\text{Cu}_2\text{Se}$  device before laser illumination and **b.** I-V graph of the same device after laser illumination. 212  $\mu\text{W}$  laser power is used to illuminate the crystal partially. **c.** Optical micrograph of the device before illumination and **d.** after illumination is given. The scale bar is 10  $\mu\text{m}$ .

### Copper leakage to electrodes

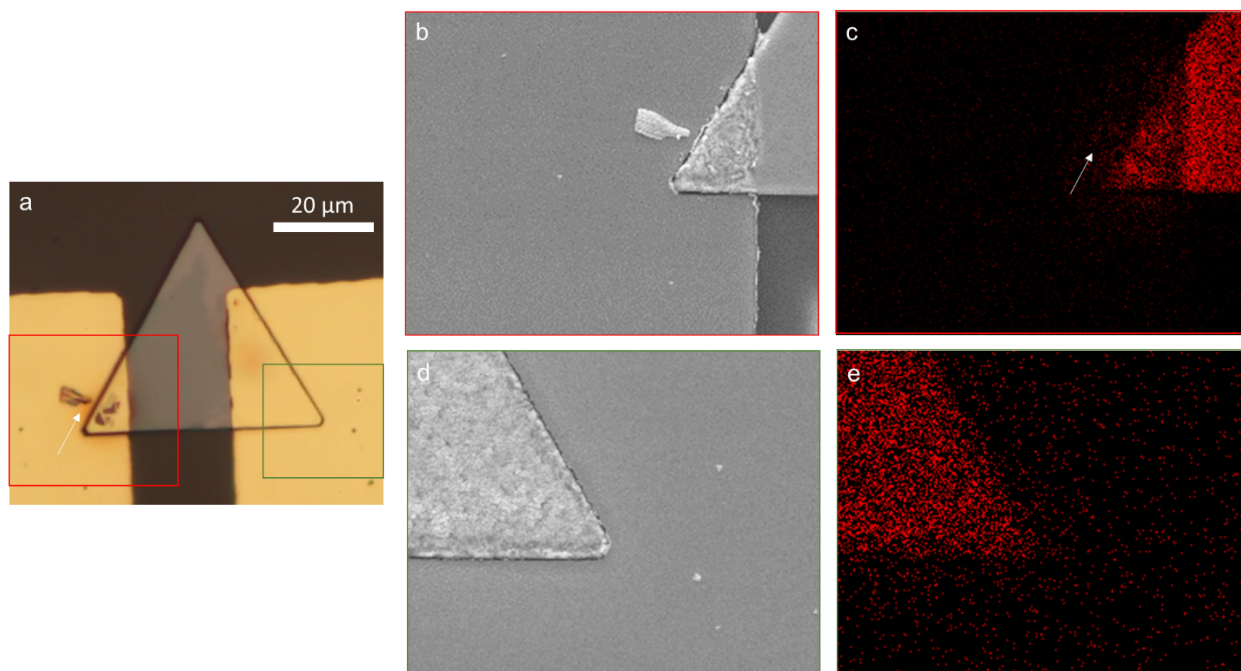

**Figure S9 a.** Optical microscope image of a two-terminal device after becoming conductive. The arrow points to the red color on the gold electrode, formed after Cu depletion. **b.** SEM image of the left contact, marked by the red rectangle in **a** and **c.** corresponding EDAX map of Cu-L. The white arrow shows the copper accumulated regions in the contacts. **d.** SEM image of the right contact, marked by the green rectangle in **a** and **e.** corresponding EDAX map of Cu-L. Only the signal is from the corner of the crystal, and the uniformly distributed signal from the rest of the image is due to background noise.



### Temperature-dependent resistance at higher temperatures

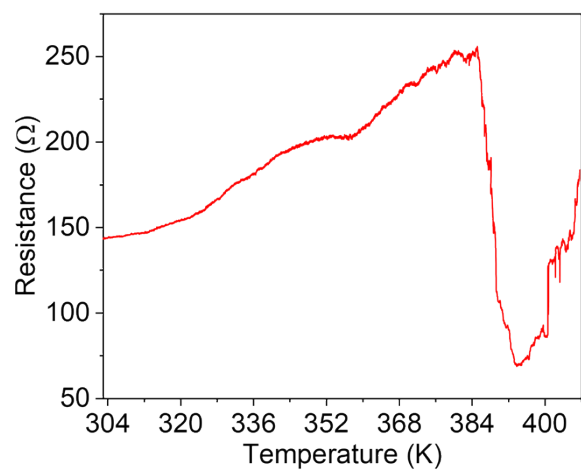

**Figure S10.** The temperature-dependent electrical resistance of a two-terminal  $\text{Cu}_2\text{Se}$  single crystal at higher temperatures.
